# Supplementary material for: The Elbrus (Caucasus, Russia) ice core record – Part 2: history of desert dust deposition
Source: Copernicus journal article supplement (doi:10.5194/acp-19-14133-2019), 2019-11-22
Supplement: Supplementary file 1 [file acp-19-14133-2019-supplement.pdf]

Supplement of Atmos. Chem. Phys., 19, 14133–14148, 2019  
<https://doi.org/10.5194/acp-19-14133-2019-supplement>  
© Author(s) 2019. This work is distributed under  
the Creative Commons Attribution 4.0 License.

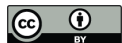

*Supplement of*

## **The Elbrus (Caucasus, Russia) ice core record – Part 2: history of desert dust deposition**

**Stanislav Kutuzov et al.**

*Correspondence to:* Stanislav Kutuzov ([kutuzov@igras.ru](mailto:kutuzov@igras.ru))

The copyright of individual parts of the supplement might differ from the CC BY 4.0 License.

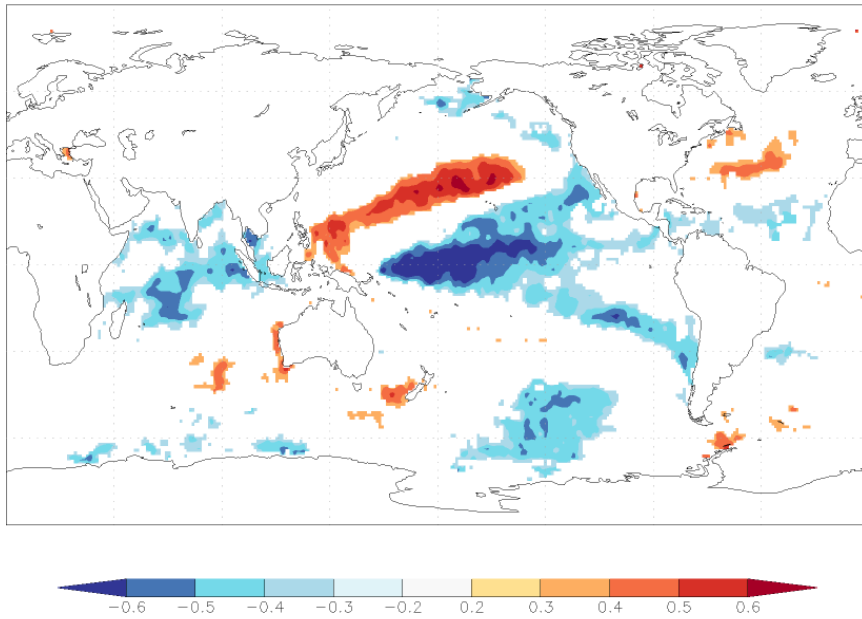

**Figure S1: Correlation between Elbrus  $\text{Ca}^{2+}$  concentrations and the December-March sea-surface temperature over the 1979-2012 period.**
